# **A Volatile Signal Controls Virulence in the Plant Pathogen *Pseudomonas syringae* pv. *syringae* and a Strategy for Infection Control in Organic Farming**

Simon Sieber,<sup>‡</sup> Anugraha Mathew,<sup>‡</sup> Christian Jenul, Tobias Kohler, Max Bär, Víctor J. Carrión, Francisco M. Cazorla, Urs Stalder, Ya-Chu Hsieh, Laurent Bigler, Leo Eberl,<sup>\*</sup> and Karl Gademann<sup>\*</sup>

## **\* Correspondence to:**

**Karl Gademann** – Department of Chemistry, University of Zurich, 8057 Zurich, Switzerland; [orcid.org/0000-0003-3053-0689](https://orcid.org/0000-0003-3053-0689); Email: [karl.gademann@uzh.ch](mailto:karl.gademann@uzh.ch)

**Leo Eberl** – Institute of Plant Biology, University of Zurich, 8008 Zurich, Switzerland; [orcid.org/0000-0002-7241-0864](https://orcid.org/0000-0002-7241-0864); E-mail: [leberl@botinst.uzh.ch](mailto:leberl@botinst.uzh.ch)

## **Authors**

**Simon Sieber** – Department of Chemistry, University of Zurich, 8057 Zurich, Switzerland; [orcid.org/0000-0003-1763-2525](https://orcid.org/0000-0003-1763-2525)

**Anugraha Mathew** – Institute of Plant Biology, University of Zurich, 8008 Zurich, Switzerland

**Christian Jenul** – Institute of Plant Biology, University of Zurich, 8008 Zurich, Switzerland

**Tobias Kohler** – Department of Chemistry, University of Zurich, 8057 Zurich, Switzerland

**Max Bär** – Department of Chemistry, University of Zurich, 8057 Zurich, Switzerland

**Victor J. Carrion** – Institute of Biology, Leiden University, 2333 BE Leiden, the Netherlands

**Francisco M. Cazorla** – Department of Microbiology, University of Málaga, 29071 Málaga, Spain

**Urs Stalder** – Department of Chemistry, University of Zurich, 8057 Zurich, Switzerland

**Ya-Chu Hsieh** – Department of Chemistry, University of Zurich, 8057 Zurich, Switzerland

**Laurent Bigler** – Department of Chemistry, University of Zurich, 8057 Zurich, Switzerland; [orcid.org/0000-0003-3548-3594](https://orcid.org/0000-0003-3548-3594)

## Abstract

*Pseudomonas syringae* is an important pathogen of many agriculturally valuable crops. Among the various pathovars described *P. syringae* pv. *syringae* (Pss) has a particularly wide host range, infecting primarily woody and herbaceous host plants. The ability of Pss to cause bacterial apical necrosis of mango trees is dependent on the production of the antimetabolite toxin mangotoxin. The production of this toxin was shown to be regulated by a self-produced signaling molecule. In this study, we determined the structure of the Pss signal molecule belonging to the recently described family of diazeniumdiolate communication molecules. Employing a targeted mass spectrometry-based approach, we provide experimental evidence that the major signal produced by Pss is the volatile compound leudiazene, which controls mangotoxin production and virulence in a detached tomato leaflet infection model. Experimental results demonstrate that KMnO<sub>4</sub> solution inactivates leudiazene and that treatment of infected leaves with KMnO<sub>4</sub> abolishes necrosis. This strategy represents the first example of chemically degrading a signaling molecule to interfere with bacterial communication. The application of KMnO<sub>4</sub> solution, which is regulatorily approved in organic farming, may constitute an environmentally friendly strategy to control Pss infections.

## Introduction

Bacteria have the extraordinary ability to sense and respond to their population density. This is generally achieved by excreting small molecules that act as messengers. When a critical threshold concentration of the signal molecule is reached, it interacts with a cognate receptor, resulting in the activation or repression of target genes.<sup>1</sup> Adaptation and coordination of gene expression is particularly important for pathogenic microorganisms that need to overcome the innate immune system of their hosts.

Among the Gram-negative bacteria the most commonly used signals for monitoring their own population density are *N*-acyl-homoserine lactones (AHLs), a phenomenon that has been termed quorum sensing.<sup>2</sup> AHL-dependent quorum sensing (QS) systems have been identified in more than 200 species, in which they regulate a wide variety of functions, often in connection with pathogenicity, surface colonization, and antibiotic production.<sup>3</sup>

Representatives of the genus *Pseudomonas* represent a good example of both benign and pathogenic plant–bacteria interactions.<sup>4</sup> While some strains are beneficial for plants,<sup>5</sup> many others, such as members of the genus *Pseudomonas syringae* (*P. syringae*), are important pathogens, which infect almost all economically important crop species.<sup>6</sup> Decades of studies have revealed the broad repertoire of virulence strategies employed by *P. syringae*, which include large numbers of functionally redundant type III secretion system (T3SS) effectors and phytotoxins.<sup>7</sup> While the major lipodepsipeptide toxins, such as the syringomycins and syringopeptins, cause direct damage to plant cells,<sup>8,9</sup> the modified peptide toxins, phaseolotoxin<sup>10,11</sup> and tabtoxin,<sup>12</sup> specifically target enzymes involved in amino acid biosynthesis.<sup>13</sup>

Another toxin that has an important ecological impact is mangotoxin, which is an inhibitor of ornithine biosynthesis.<sup>14</sup> This compound has been isolated from *P. syringae* pv. *syringae* (Pss) which is the causal agent of bacterial apical necrosis (BAN) of mango trees.<sup>15</sup> To date, the structure of mangotoxin is unknown but a preliminary characterization indicated that the molecular weight of mangotoxin could be smaller than 3 kDa and that the compound could be resistant to extreme pH and high temperature.<sup>14</sup>

The *mbo* gene cluster encoding the mangotoxin biosynthesis genes was first described in Pss<sup>16</sup> and was later also identified in many other *P. syringae* pathovars.<sup>17–19</sup> Investigations of the regulation of mangotoxin production has led to the identification of the *mgo* operon, which was shown to be required for the production of an unknown signal molecule.<sup>20,21</sup> The *mgo* gene cluster comprises four genes, namely *mgoB*, a predicted haem oxygenase, *mgoC*, a homolog of the *N*-oxygenase *aurF*,<sup>22</sup> *mgoA*, a non-ribosomal peptide synthetase (NRPS) and *mgoD* a putative polyketide cyclase/dehydratase.<sup>20,21</sup> Homologs of the *mgo* cluster have also been identified in other *Pseudomonas* strains such as the insect pathogen *Pseudomonas entomophila* (*pvf* cluster),<sup>23</sup> the sugar cane endophyte *Pseudomonas aurantiaca* PB-St2,<sup>24</sup> *Pseudomonas* sp. SH-C52,<sup>25</sup> several *Pseudomonas fluorescens* strains,<sup>26</sup> and from various pathogenic *Burkholderia* species (*ham* cluster).<sup>27,28</sup>

Recently, we discovered that the *ham* gene cluster directs the synthesis of two diazeniumdiolate natural products: the antifungal metabolite fragin and the novel signaling molecule valdiazin (**1**, **Figure 1**).<sup>27</sup> During the last two years, this functional group has been also associated with the discovery of a new class of siderophore<sup>29–31</sup> and the identification of alanosine gene cluster.<sup>32,33</sup> In *Burkholderia cenocepacia* H111, *hamA*, *C*, *D*, and *E* genes, which are homologs of the *mgo* genes, were shown to be involved in the biosynthesis of valdiazin (**1**).<sup>27,34</sup> The proposed biosynthesis of valdiazin (**1**) starts with L-valine as the initial NRPS substrate and the diazeniumdiolate functional group is hypothesized to be formed by tailoring enzymes. To conclude, the NRPS reduction domain of HamD is thought to perform the last steps of valdiazin (**1**) biosynthesis with a four electron reduction process.<sup>27,34</sup> Furthermore, in 2018, Li and coworkers engineered a *P. entomophila* strain to overexpress the *pvf* cluster leading to the production of three *N*-oxide metabolites<sup>35</sup> and they investigated the role of the *N*-oxygenase in the biosynthesis of valdiazin (**1**).<sup>36</sup> In a follow up study, the same research group investigated the substrate specificity of the NRPS domain of PvfC and its homologs MgoA and HamD in different proteobacteria and concluded that at least two types of signaling molecules are produced by the different strains<sup>37</sup>

To date, the signaling molecules produced by *P. entomophila* and Pss have not been identified. Based on our recent discovery of valdiazene (**1**), we aimed at identifying the structure of the signaling molecule produced by Pss, which we hypothesized to be similar to **1**. Furthermore, we speculated that the knowledge of the signaling molecule structure might pave the way to develop a strategy for plant protection (**Figure 1**).

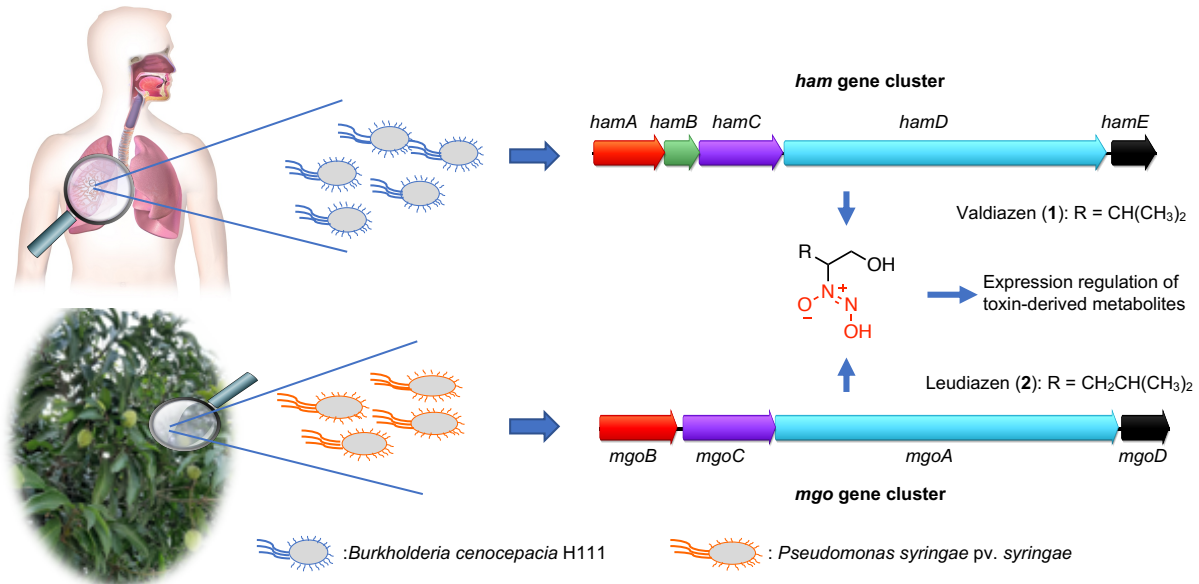

**Figure 1.** The *ham* gene cluster was identified in the genome of the human pathogen *B. cenocepacia* H111 and the genes *hamA*, *hamC*, *hamD* and *hamE* direct the synthesis of diazeniumdiolate valdiazene (**1**).<sup>27,34</sup> Valdiazene (**1**) regulates the expression of more than 100 genes including the *hamABCDE* and *hamFG* operons encoding the major antifungal metabolite of the strain, fragin. Likewise, the homologous *mgo* cluster in the plant pathogenic bacteria Pss<sup>16,20</sup> was shown to encode a signaling molecule that regulates the production of mangotoxin.<sup>21</sup>

## Results

### Isolation of the Putative Mangotoxin Signaling Compound

Mangotoxin biosynthesis is regulated by a yet unknown signal encoded by the *mgoBCAD* operon.<sup>21</sup> Accordingly, the activity of the *mboA* promoter was found to be significantly reduced in a  $\Delta mgoA$  mutant background compared to the activity in the wild type strain.<sup>16</sup> We used a transcriptional fusion of the *mbo* promoter to the *lacZ* gene in the  $\Delta mgoA$  mutant background as a sensor strain for the identification of the unknown signal. Due to the high similarities between the *mgo* gene cluster<sup>20</sup> and the recently elucidated *ham* gene cluster encoding valdiazin (**1**),<sup>27</sup> we hypothesized that the signaling molecule produced by Pss may be valdiazin (**1**) or a related compound. In order to isolate the signal compound, we employed a similar isolation strategy as for valdiazin (**1**).<sup>27</sup> This included an acidification of the supernatant to a pH of 5 followed by a liquid-liquid extraction with CH<sub>2</sub>Cl<sub>2</sub>. The isogenic  $\Delta mgoA$  mutant ( $\Delta mgoA$ )<sup>20</sup> was used as negative control. We confirmed that the mangotoxin promoter was induced by the extract of the wild type but not by the  $\Delta mgoA$  (**Figure 2A**). Valdiazin (**1**) was found to only weakly induce the biosensor relative to the Pss extract, indicating that the unknown signaling molecule is likely not valdiazin (**1**) but a structurally related molecule (**Figure 2A**).

Extracts of the wild type and the  $\Delta mgoA$  mutant were compared using several analytical techniques to identify the signal molecule. Both samples were extensively studied by NMR and UHPLC/MS but no difference could be observed. We hypothesized that the concentration of the signaling molecule was significantly lower than in the case of valdiazin (22  $\mu$ M)<sup>27</sup> and we therefore employed several methods to concentrate and purify the compound. A preliminary separation of the extract was achieved using a reverse phase (RP) solid phase extraction (SPE), indicating that the compound was retained in the column with H<sub>2</sub>O as solvent but was eluted with MeOH. Encouraged by the capacity of a reverse phase resin to separate the compound, a fractionation by HPLC was performed using H<sub>2</sub>O and MeCN possessing either 0.1% HCOOH or 0.1% NH<sub>4</sub>OAc as additive. Unfortunately, the obtained fractions possessed a lower activity in our assay than the original extract. These results suggested that the compound was either unstable or volatile.

## Synthesis of Valdiazen Derivatives

Since our results indicated that the compound is potentially an analog of valdiazen (**1**), we embarked on the synthesis of several derivatives of **1**. We selected the aliphatic amino acids glycine, alanine, leucine, and isoleucine as starting materials. The synthesis pathway of leudiazen (**2**) and isoleudiazen (**3**) followed our previously described route.<sup>27</sup> Briefly, each amino alcohol was oxidized using a three step procedure to obtain the corresponding hydroxylamine.<sup>38</sup> The diazeniumdiolate was synthesized with the addition of isoamyl nitrite in the presence of ammonia and the compound was purified following an acid-base workup. (**Figure 2B a**) However, this procedure was unsuccessful for glydiazen (**4**) and aladiazen (**5**) (also known as nitrosofungin)<sup>39</sup> due to the instability of the intermediates. For these compounds, another strategy was developed using a one pot procedure. 2-Nitroethanol was reduced with Pd/C, the reaction was filtered and isoamyl nitrite was directly added. Glydiazen (**4**) and aladiazen (**5**) were obtained after purification using an anion exchange SPE column (TMA-acetate, **Figure 2B b**).

The five newly synthesized derivatives were tested for their ability to induce the *mbo* promoter. Leudiazen (**2**) possessed the highest activity and we therefore hypothesized that it could be the signaling molecule produced by the *mgo* gene cluster (**Figure 2C**). Furthermore, we investigated the activity of the (*R*) and (*S*) enantiomer of leudiazen and no significant difference in potency were observed (**Figure S1**). We decided to continue our study with leudiazen ((*S*)-**2**), which can be synthesized from commercially available (*S*)-leucinol.



### **Detection of leudiazin in a Pss culture supernatant extract**

In order to increase the sensitivity of our strategy, we developed a UHPLC-MS/MS detection method targeting the predicted signaling molecule leudiazin (**2**) by selective reaction monitoring (SRM). We extracted 2 L of Pss culture supernatant following a modified version of our previously described protocol.<sup>27</sup> The extract was immediately analyzed to avoid the decomposition of the signaling compound. Using this sensitive UHPLC-MS/MS strategy, we were able to detect and quantified the concentration of leudiazin (**2**) in the SRM mode using the characteristic MS/MS fragmentation pattern of the compound (163 Da to 83 Da). Leudiazin (**2**) was detected in the crude extract and its concentration was determined to be  $74 \pm 7$  nM in the Pss supernatant. No leudiazin (**2**) was detected in the extract of the  $\Delta mgoA$  mutant (**Figure 2D**).

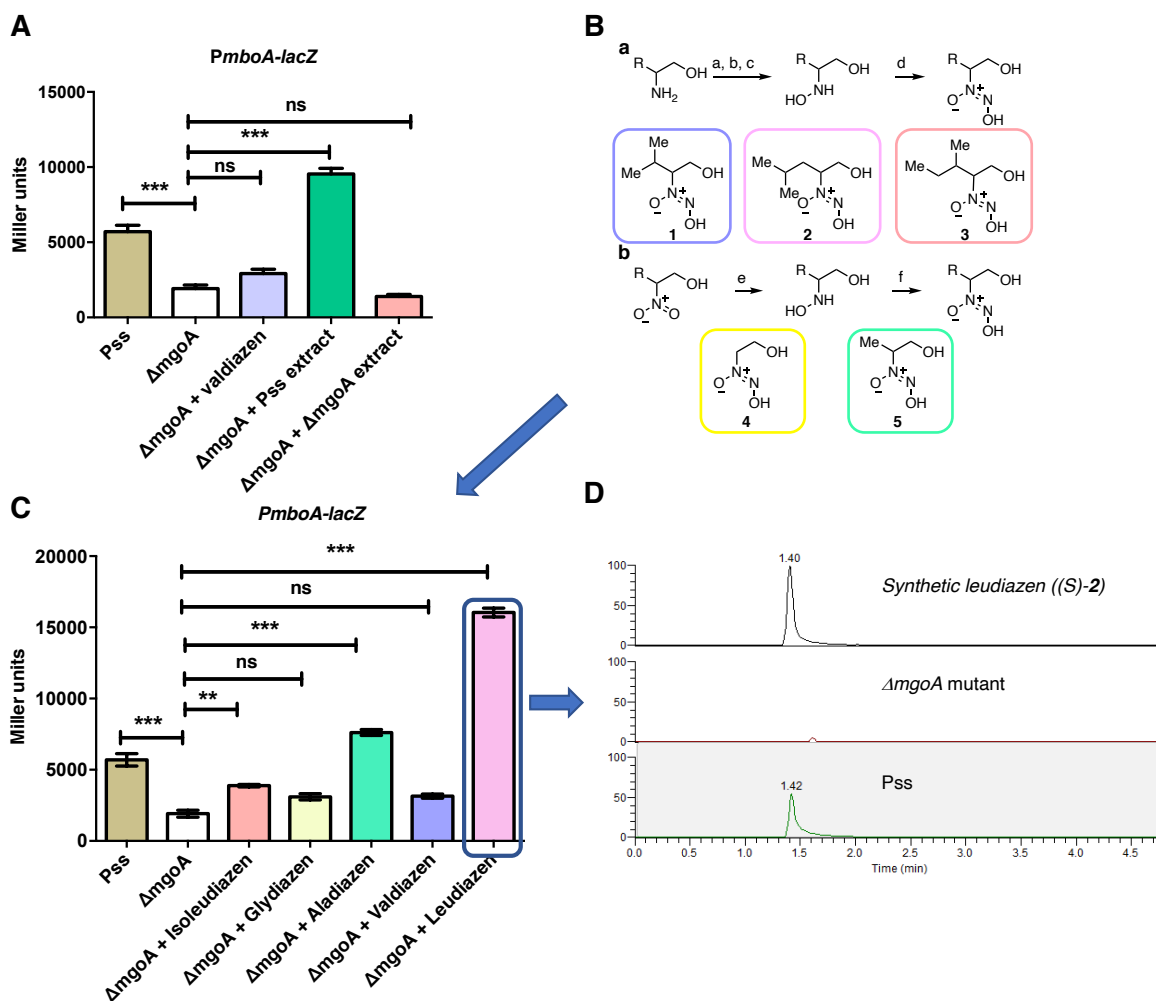

**Figure 2.** **A)** The *mbo* promoter is activated by a compound present in the extract of the Pss supernatant. The activity of the *PmboA-lacZ* fusion was measured in the presence of extracts of the wild type (Pss) and the  $\Delta mgoA$  mutant strain as well as in the presence of synthetic valdiazene (**1**, 50  $\mu$ M). As a control, we also included the wild type strain (Pss) harboring the sensor plasmid. Results are presented as mean and error bars represent SE. Statistical analysis was performed using one-way ANOVA and Tukey's multiple comparison as post-test; ns, not significant. Significance is indicated by two or three stars. \*\*\* $p < 0.001$ ,  $n = 3$ ; **B) a)** Synthetic route for leudiazene (**2**) and isoleudiazene (**3**). a) *p*-anisaldehyde,  $\text{CH}_2\text{Cl}_2$ , RT, 45 min, 40°C, 1.5 h; b) *m*-CPBA,  $\text{CH}_2\text{Cl}_2$ , 0°C, 1 h, RT, 1 h; c)  $\text{H}_2\text{NOH}\cdot\text{HCl}$ , MeOH, RT, 3 d; d) isoamyl nitrite, MeOH,  $\text{NH}_3(\text{g})$ , RT, 30 min, 15% over 4 steps for leudiazene (**2**) and 10% over 4 steps for isoleudiazene (**3**). **(b)** Synthetic pathway for glydiazene (**4**) and aladiazene (**5**). e) Pd/C (10%), EtOH, RT, 2 h; f) Isoamyl nitrite, 0°C, 15 min, RT, 20 min, 18% over 2 steps for glydiazene (**4**) and 31% over 2 steps for aladiazene (**5**); **C)** The activity of the *PmboA-lacZ* fusion in the presence of different valdiazene derivatives: The  $\beta$ -galactosidase activity of the biosensor plasmid was low in the  $\Delta mgoA$  mutant relative to the activity in the wild type background (Pss) but could be stimulated to different degrees in the presence of valdiazene derivatives. Results are presented as mean and error bars represent SE. Statistical analysis was performed using one-way ANOVA and Tukey's multiple comparison as post-test; ns, not significant. Significance is indicated by two or three stars. \*\*\* $p < 0.001$ ,  $n = 3$ ; **D)** Specific detection of leudiazene (**2**) with UHPLC-MS/MS in SRM mode ( $m/z$  163 to 83 Da,  $t_r = 1.4$  min). From top to bottom: synthetic leudiazene ((S)-**2**), supernatant of the  $\Delta mgoA$  mutant and supernatant of Pss.

We determined the response of the promoter to different concentrations of leudiazin (2). We observed that the addition of synthetic leudiazin ((S)-2) to the growth medium activated the biosensor strain in a dose dependent manner (**Figure 3A**). Addition of 1  $\mu$ M and above of leudiazin (2) restored the  $\beta$ -galactosidase activity even above the level observed with the sensor plasmid in the wild type background.

We next tested whether leudiazin (2) could restore mangotoxin production of the  $\Delta mgoA$  mutant using an *E. coli* indicator strain. We grew the wild type and the  $\Delta mgoA$  mutant in the absence or presence of different amounts of leudiazin ((S)-2) and tested for growth inhibition of the *E. coli* indicator strain. In this assay, mangotoxin production is indicated by a halo around the colony. While the  $\Delta mgoA$  mutant did not exhibit a clearing zone (**Figure 3B a**), mangotoxin production was restored when the mutant was grown in the presence of 10  $\mu$ M leudiazin ((S)-2) (**Figure 3B f**). The addition of valdiazin (1, **Figure 3B c**) did not rescue the mutant phenotype.

#### **Leudiazin controls Virulence of Pss.**

Given that mangotoxin is a major virulence factor of Pss, we examined whether leudiazin (2) would also restore virulence of the  $\Delta mgoA$  mutant strain using detached tomato leaflets as infection model. While the wild type strain caused severe necrosis 10 days post infection (dpi) the  $\Delta mgoA$  was strongly attenuated (**Figure 3C**). However, virulence was fully restored when the  $\Delta mgoA$  mutant was grown in the presence of 10  $\mu$ M leudiazin ((S)-2).

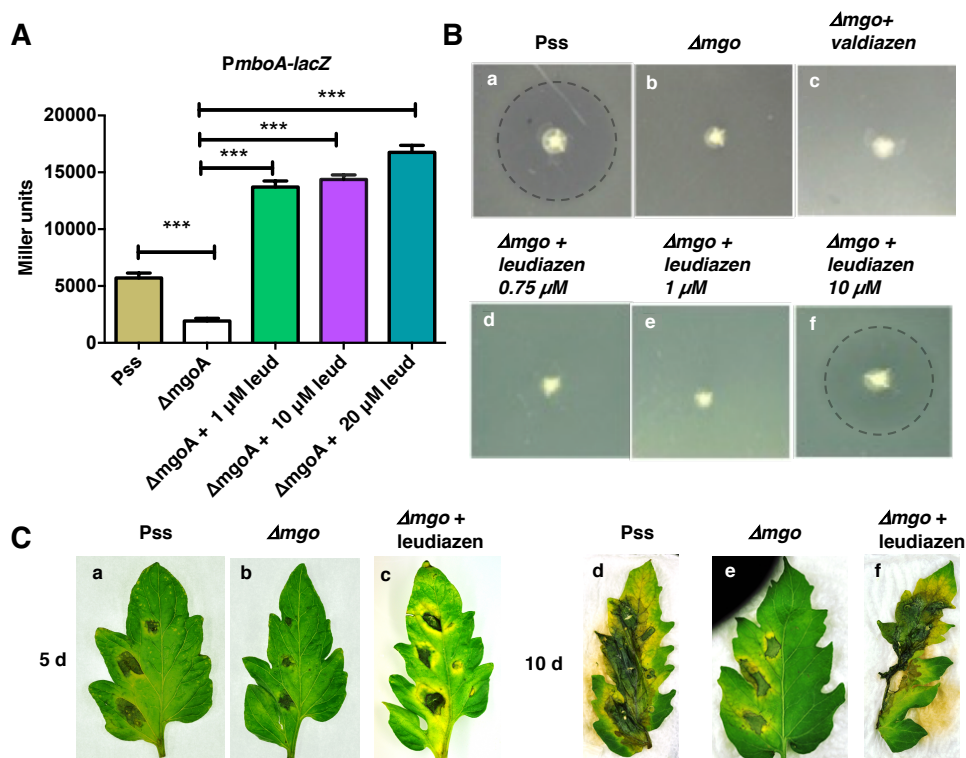

**Figure 3. A)** Activities of the *mboA* promoter in the presence of various concentrations of leudiazene (**2**, leud): The biosensor was grown in media supplemented with various concentrations of synthetic leudiazene ((*S*)-**2**) and  $\beta$ -galactosidase activities were recorded. Results are presented as mean and error bars represent SE. Statistical analysis was performed using one-way ANOVA and Tukey's multiple comparison as post test. ns, not significant. Significance is indicated by one or three stars. \*\*\* $p < 0.001$ ,  $n = 3$ ; **B)** Mangotoxin production assay using *E. coli* as an indicator (a) Halo around Pss indicates mangotoxin production while there's no halo around (b)  $\Delta mgo$  (c)  $\Delta mgo$  supplemented with valdiazene (**1**); (d)  $\Delta mgo$  supplemented with 0.75  $\mu M$  and (e) 1  $\mu M$  leudiazene ((*S*)-**2**). Mangotoxin production was restored when (f)  $\Delta mgo$  supplemented with 10  $\mu M$  leudiazene ((*S*)-**2**). The halos are highlighted with a dashed line; **C)** Leudiazene controls virulence of Pss. Tomato leaves were infected with the wild type and the  $\Delta mgoA$  mutant in the absence or presence of 10  $\mu M$  leudiazene ((*S*)-**2**). Pictures were taken 5 and 10 days post-infection (dpi).

### Leudiazene is a Volatile Secondary Metabolite.

Intrigued by the difficulties we encountered during the isolation of leudiazene (**2**), we decided to investigate the stability of the compound. The degradation of leudiazene ((*S*)-**2**) was studied by  $^1H$ -NMR in two different solvents,  $D_2O$  and MeOD, with seven time points, 10 min, 60 min, 3 h, 24 h, 48 h, 72 h, 144 h, and at room temperature. Leudiazene (**2**) was found to be stable in MeOD for 48h and in  $D_2O$  for 3 h. Thereafter, the appearance of a by-product was observed (**Figure S3** and **S4**). The partial degradation of leudiazene (**2**) could not explain the loss of the compound in our previous isolation attempts and for this reason we investigated the volatility of the compound.

Leudiazene ((*S*)-**2**) was evaporated under a gentle flow of nitrogen or under vacuum, which are the standard procedures we used during our isolation strategy. The weight of the sample was determined over a time period of 8 h. After 4h, we observed that more than 50% of the sample weight was lost and after 8 h most of the compound had evaporated (**Figure S5**). Furthermore, a head-space experiment was performed by heating leudiazene ((*S*)-**2**) in a vial to 100°C for 10 min, the gas phase was transferred into another vial containing MeCN and this solution was analyzed by HRMS (**Figure S6**). The results showed that leudiazene (**2**) was present in the gas phase of the first vial, as it was detected in the MeCN solution. Additionally, the ability of leudiazene (**2**) to diffuse through air was tested on a split plate system using *E. coli* as an indicator strain to assess mangotoxin production. In this experiment, a halo around the colony was an indication of the mangotoxin production by the *mbo* gene cluster which was activated by leudiazene (**2**). While the  $\Delta mgoA$  mutant did not exhibit any antibacterial activity, the presence of leudiazene (**2**) in the adjacent compartment enabled the mutant to restore mangotoxin production and a clearing halo could be observed (**Figure 4 A**). Furthermore, no halo was observed when charcoal, a volatile trap, was added to one of the compartments (**Figure S8**).

### **Inactivation of Leudiazene**

Given that leudiazene controls the virulence of Pss, we hypothesized that inhibition of this communication system could be an effective way to control the pathogenicity of the strain. We therefore sought of developing a chemical strategy for the degradation of leudiazene (**2**) and potentially other diazeniumdiolates. Given that previous work demonstrated the ability of KMnO<sub>4</sub> to efficiently decompose the diazeniumdiolate functional group,<sup>40</sup> we treated leudiazene ((*S*)-**2**) with KMnO<sub>4</sub> at different concentrations (0, 10, 100, 300 and 500 ppm), stirred the solution for 10 min and determined the degradation of the signaling molecule by UHPLC-UV. These experiments revealed that a concentration of 300 ppm of KMnO<sub>4</sub> was sufficient to completely inactivate leudiazene ((*S*)-**2**) after 10 min (**Figure 4B**).

## Dilute $\text{KMnO}_4$ solution protects detached tomato leaves from *P. syringae* infection

Since  $\text{KMnO}_4$  treatment efficiently inactivates the leudiazene signal compound, we next tested whether dilute  $\text{KMnO}_4$  solution could protect tomato leaves from infection with Pss. Our results demonstrate that the infected plant leaves that were treated with an aqueous  $\text{KMnO}_4$  solution (1000 ppm) did not possess necrotic symptoms while untreated leaves were severely affected (**Figure 4C a**). We could recover Pss cells from treated and the untreated leaves (**Figure 4C b**), indicating that the treatment is not affecting bacterial growth.

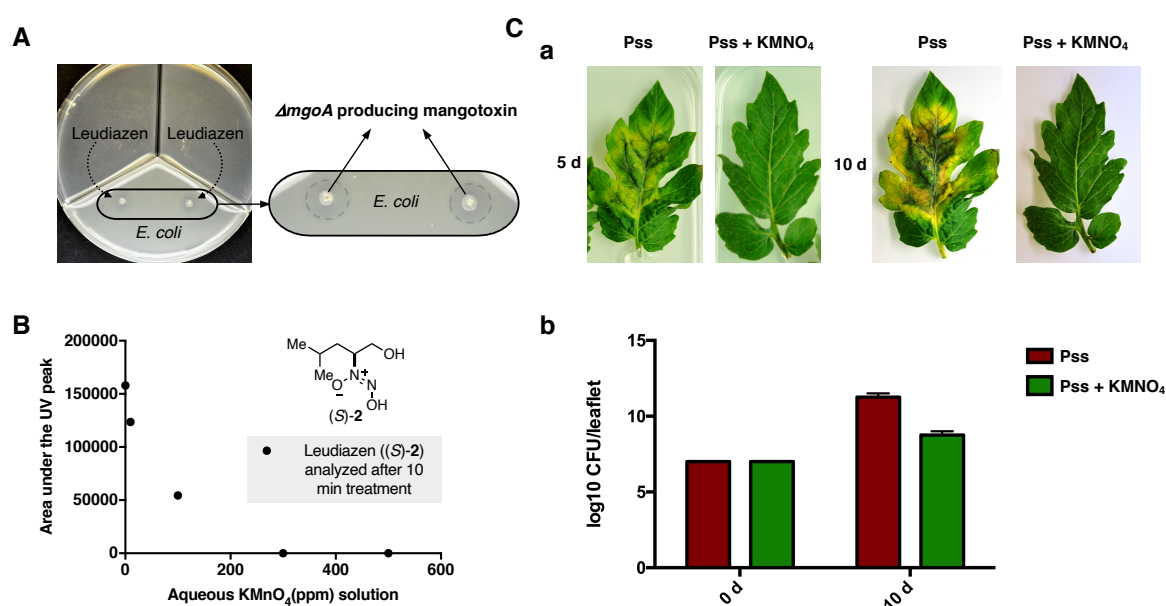

**Figure 4.** **A**) Split plate assay with leudiazene (**2**) in the adjacent compartments and  $\Delta mgo$  stabbed on two spots over the lawn of *E. coli*. Halos around the  $\Delta mgo$  denotes growth inhibition of *E. coli* by mangotoxin production **B**). A solution of leudiazene ((S)-**2**, 10  $\mu\text{g}/\text{mL}$ ) was treated with  $\text{KMnO}_4$  at concentrations varying from 09 to 500 ppm. The solutions were stirred for 10 min and analyzed by UHPLC-UV (254 nm). The areas under the UV peaks are reported; **C**) An aqueous  $\text{KMnO}_4$  solution (1000 ppm) protects tomato leaves from *P. syringae* infection. **(a)** Pictures showing tomato leaves infected with the wild type strain (first image: 5 dpi, third image: 10 dpi) and the wild type strain followed by treatment with  $\text{KMnO}_4$  (second image: 5 dpi, fourth image: 10 dpi). **(b)** Amount of *P. syringae* cells recovered at 10 dpi. The red bars represent the recovered bacteria from the untreated leaves and the green plots represent the recovered bacteria from the leaves treated with  $\text{KMnO}_4$ .

## Discussion

Pss, a major pathovar among the 60 members of the heterogeneous group of *P. syringae*, causes bacterial apical necrosis (BAN) of mango trees resulting in severe economic losses.<sup>41</sup> Previous studies, based on phenotypic and genetic analysis, revealed that Pss strains isolated from mango constitute a cluster characterized by mangotoxin production and are distinct from the Pss isolates of other hosts.<sup>42</sup> Moreover, the gene cluster directing the biosynthesis of mangotoxin has been identified<sup>16</sup> and mangotoxin production was shown to be controlled by a self-produced signaling molecule.<sup>20,21</sup> However, neither the structure of the toxin nor of the signal has been elucidated. In our study, we identified this key regulatory signal molecule of Pss named leudiazin (**2**), which is the second representative of the recently described diazeniumdiolate signal family.<sup>27</sup>

Our first isolation attempt was based on a classical bioassay-guided fractionation approach. Pss extract was separated by several analytical techniques and the fractions were analyzed using our reporter strain. We were surprised to observe a loss in biological activity during the fractionation process and we hypothesized that the compound decomposed. Based on the similarities of the *mgoA* NRPS adenylation domain with its homologs,<sup>37</sup> the signaling molecule produced by Pss was proposed to be an analog of valdiazin (**1**). We embarked on the development of a structure-activity relationship (SAR) of **1**. The structure of the derivatives was designed by replacing the valine moiety of **1** by alanine, leucine, isoleucine, and glycine. Two synthetic strategies were elaborated for the formation of the hydroxylamine key intermediate. Using these approaches, we obtained aladiazin (**5**), leudiazin (**2**), isoleudiazin (**3**), and glydiazin (**4**). The compounds were tested for their ability to rescue *mbo* promoter activity and mangotoxin production in the  $\Delta mgoA$  mutant strain and leudiazin (**2**) was the most effective compound. This result indicated that it may be the indigenous signal produced by Pss (Figure **2C**) and is also in line with a bioinformatics analysis of the substrate specificity of the adenylation domain of MgoA.<sup>37</sup>

To increase the sensitivity of our detection strategy, we developed a UHPLC-MS/MS method using our synthetic standard. An extraction was performed on two liters culture media containing Pss and its  $\Delta mgoA$  mutant. Leudiazin (**2**) was unambiguously identified only in the extract of Pss and the concentration of leudiazin (**2**) was

determined to be  $74 \pm 7$  nM in the supernatant. Unfortunately, the absolute configuration of the naturally produced leudiazene (**2**) could not be identified due to the low amount produced by the strain. We hypothesized that leudiazene (**2**) is produced as a racemate as it was shown for valdiazene (**1**). Both enantiomers of leudiazene, ((*S*)-**2**) and ((*R*)-**2**) were evaluated and no significant difference in potency was observed (Figure **S1**). Therefore, the naturally derived enantiomer (*S*)-**2** was used for all the experiments. Interestingly, leudiazene (**2**) concentration was found to be approximately 300 times lower compared to the concentration of valdiazene (**1**) that we recovered from the supernatant of *B. cenocepacia* H111. It is also important to note that we could only restore mangotoxin production of the  $\Delta mgoA$  mutant when the strain was exposed to at least 10  $\mu$ M leudiazene ((*S*)-**2**). This may indicate that leudiazene (**2**) is either unstable or is not efficiently taken up by the cell or that the organism produces much higher amounts of the signaling molecule under *in vivo* conditions compared to the laboratory growth conditions used. At present we favor the last option, as we observed that the *mboA* promoter activity was induced in the presence of a mango leaf extract (data not shown), suggesting that a plant compound may stimulate leudiazene (**2**) biosynthesis. However, additional work will be required to unravel the spatial and temporal production of leudiazene (**2**) (and consequently mangotoxin) during the infection process.

The chemical properties of leudiazene (**2**) were studied and the results of our experiments suggested that leudiazene (**2**) is volatile (**Figure 4A**). The volatility is a striking feature that differentiates leudiazene (**2**) from other signaling molecules. Very few volatile signals in bacteria have been described to date and they include indole, which is produced by *E. coli* and many other bacteria, as well as methyl 3-hydroxypalmitate (3-OH PAME) and methyl 3-hydroxymyristate ((*R*)-3-OH MAME) by *Ralstonia solanacearum* (*R. solanacearum*).<sup>43-45</sup> Notably, 3-OH PAME and (*R*)-3-OH MAME, like leudiazene (**2**), control virulence in a major plant pathogen *R. solanacearum*.<sup>43,45</sup> Volatile signals could be key to long distance communication and may thus be instrumental in establishing and disseminating the infection in the host. Work currently under progress therefore aims at detecting leudiazene (**2**) in the headspace of Pss cultures as well as in the gas phase of plates containing infected



tomato leaves to confirm the occurrence of leudiazin as a volatile messenger even in natural conditions.

Most pathogenic bacteria utilize signaling molecules to coordinate the expression of virulence factors, such that the infected host is unable to launch a timely immune response. Hence, interference with bacterial signaling has emerged as a highly valuable strategy for the development of novel anti-infective drugs that do not aim at killing the pathogen but attenuate their virulence.<sup>46</sup> We exploited the instability of leudiazin (**2**) to develop such an anti-virulence strategy. Given that leudiazin-mediated signaling is a major regulator of virulence, we reasoned that degradation of leudiazin (**2**) would impair the pathogenicity of Pss without affecting the viability of the organism. As a consequence, such a treatment regime may be less vulnerable to the appearance of resistant mutants.

In fact quorum sensing inhibition strategies have been extensively studied in different bacteria and most of them described to date involve enzymatic degradation and inactivation of regulatory signals.<sup>47,48</sup> The potential of employing such signal inhibitors in disease prevention and treatment of *Erwinia carotovora* infection has been shown in various plant models.<sup>49,50</sup> However, an anti-virulence strategy by chemical inactivation of signaling molecule has not been demonstrated. In accordance with a previous study which reported that KMnO<sub>4</sub> efficiently oxidizes the diazeniumdiolate cupferron,<sup>51</sup> we provided evidence that it also decomposes leudiazin (**2**) at a concentration as low as 300 ppm (**Figure 4B**) in 10 min. More importantly, the virulence assays reported above underline the strategy that a KMnO<sub>4</sub> treatment, using a solution concentrated at 1000 ppm, efficiently protects the plant leaves from Pss infection. In this context it is noteworthy that KMnO<sub>4</sub> displays low toxicity and is used for the treatment of various skin lesions or diseases, including impetigo, pemphigus, dermatitis, and tropical ulcers<sup>52</sup> as well as an antifungal agent to treat mildew on plant leaves.<sup>53</sup> Interestingly, KMnO<sub>4</sub> solutions are regulatorily approved for organic farming for fruit and olive trees in the European Union.<sup>54</sup>

Our results demonstrate that chemical inactivation of leudiazin prevents Pss to produce mangotoxin, a main virulence factor of this organism. Additional work will be required to evaluate the applicability of this approach under field conditions. Indeed, none of the conventional Bordeaux mixture treatments conferred complete protection

against BAN in previous field trials<sup>55</sup> and an effective treatment strategy is urgently required to limit the economic loss due to Pss infections.

The discovery of leudiazin (**2**) confirmed the existence of a new class of signaling molecule composed of diazeniumdiolate compounds. It is particularly interesting that variants of the diazeniumdiolate class of signal molecules regulate different metabolites in phylogenetically diverse bacteria ranging from plant beneficial strains to plant and human pathogens.<sup>21,23,27,56</sup> This suggests that this novel family of signal molecules controls various phenotypic traits and our future work aims at characterizing the role of these communication systems in diverse bacteria.

## Conclusion

A novel signaling molecule, named leudiazin (2), was isolated from the plant pathogen *Pss*. This natural product belongs to the rare family of compounds possessing a diazeniumdiolate and represents the second member of a new class of signaling molecules. Leudiazin (2) was found to be essential for the virulence of the pathogen by the positive regulation of mangotoxin. Additionally, leudiazin (2) was found to be volatile using a head-space experiment and was found to decompose in aq. solution. Taking advantage of the instability of leudiazin (2), we developed a biocontrol strategy on the basis of dilute  $\text{KMnO}_4$  solution. Leudiazin (2) is shown to be sensitive to the treatment with a  $\text{KMnO}_4$  solution and preliminary results from pathogenicity assays indicated that this solution inactivates the signaling molecule without affecting growth of the bacteria. This finding represents the first example of chemical inactivation of a bacterial signaling molecule to attenuate the virulence of a pathogen. Furthermore, our new approach using a  $\text{KMnO}_4$  solution to limit BAN is regulatorily approved for organic farming in the European Union.

### **Author Contributions**

All authors contributed to the redaction of the manuscript. The experiments were planned by S. S., A. M., L. E. and K. G. †The authors S. S. and A. M. contributed equally.

### **Funding Sources**

The research was funded in part by the Swiss National Science Foundation (CRSII5\_186410 and 200021\_182043)

### **Notes**

The authors declare no competing financial interest.

### **ACKNOWLEDGMENT**

We thank Dr. Kirsty Agnoli for her help with the signal extraction procedures and Dr. Carlotta Fabbri for the excellent technical assistance

## REFERENCES

- (1) Bassler, B. L. Small Talk: Cell-to-Cell Communication in Bacteria. *Cell* **2002**, *109*, 421–424.
- (2) Eberl, L. N-Acyl Homoserinelactone-Mediated Gene Regulation in Gram-Negative Bacteria. *Syst. Appl. Microbiol.* **1999**, *22* (4), 493–506
- (3) Toyofuku, M.; Morinaga, K.; Hashimoto, Y.; Uhl, J.; Shimamura, H.; Inaba, H.; Schmitt-Kopplin, P.; Eberl, L.; Nomura, N. Membrane Vesicle-Mediated Bacterial Communication. *ISME J.* **2017**, *11* (6), 1504–1509.
- (4) Passera, A.; Compant, S.; Casati, P.; Maturo, M. G.; Battelli, G.; Quaglino, F.; Antonielli, L.; Salerno, D.; Brasca, M.; Toffolatti, S. L.; Mantegazza, F.; Delledonne, M.; Mitter, B. Not Just a Pathogen? Description of a Plant-Beneficial *Pseudomonas syringae* Strain. *Front. Microbiol.* **2019**, *10*, 1409.
- (5) Pieterse, C. M. J.; Zamioudis, C.; Berendsen, R. L.; Weller, D. M.; Van Wees, S. C. M.; Bakker, P. A. H. M. Induced Systemic Resistance by Beneficial Microbes. *Annu. Rev. Phytopathol.* **2014**, *52* (1), 347–375.
- (6) Lamichhane, J. R.; Messéan, A.; Morris, C. E. Insights Into Epidemiology and Control of Diseases of Annual Plants Caused by the *Pseudomonas syringae* Species Complex. *J. Gen. Plant. Pathol.* **2015**, *81* (5), 331–350.
- (7) Xin, X.-F.; Kvitko, B.; He, S. Y. *Pseudomonas syringae*: What It Takes to Be a Pathogen. *Nat. Rev. Microbiol.* **2018**, *16* (5), 316–328.
- (8) Bidwai, A. P.; Zhang, L.; Bachmann, R. C.; Takemoto, J. Y. Mechanism of Action of *Pseudomonas Syringae* Phytotoxin, Syringomycin : Stimulation of Red Beet Plasma Membrane ATPase Activity. *Plant. Physiol.* **1987**, *83* (1), 39–43.
- (9) Ballio, A.; Barra, D.; Bossa, F.; Collina, A.; Grgurina, I.; Marino, G.; Moneti, G.; Paci, M.; Pucci, P.; Segre, A.; Simmaco, M. Syringopeptins, New Phytotoxic Lipodepsipeptides of *Pseudomonas syringae* Pv. *syringae*. *FEBS Lett.* **1991**, *291* (1), 109–112.
- (10) Mitchell, R. E. Isolation and Structure of a Chlorosis-Inducing Toxin of *Pseudomonas phaseolicola*. *Phytochemistry* **1976**, *15* (12), 1941–1947.

- (11) Moore, R. E.; Niemczura, W. P.; Kwok, O. C. H.; Patil, S. S. Inhibitors of Ornithine Carbamoyltransferase From *Pseudomonas syringae* Pv. *phaseolicola*. Revised Structure of Phaseolotoxin. *Tetrahedron Lett.* **1984**, *25* (36), 3931–3934.
- (12) Stewart, W. W. Isolation and Proof of Structure of Wildfire Toxin. *Nature* **1971**, *229*, 174–178.
- (13) Bender, C. L.; Alarcón-Chaidez, F.; Gross, D. C. *Pseudomonas syringae* Phytotoxins: Mode of Action, Regulation, and Biosynthesis by Peptide and Polyketide Synthetases. *Microbiol. Mol. Biol. Rev.* **1999**, *63* (2), 266–292.
- (14) Arrebola, E.; Cazorla, F. M.; Durán, V. E.; Rivera, E.; Olea, F.; Codina, J. C.; Pérez-García, A.; de Vicente, A. Mangotoxin: a Novel Antimetabolite Toxin Produced by *Pseudomonas syringae* Inhibiting Ornithine/Arginine Biosynthesis. *Physiol. Mol. Plant Pathol.* **2003**, *63* (3), 117–127.
- (15) Arrebola, E.; Cazorla, F. M.; Romero, D.; Pérez-García, A.; de Vicente, A. A Nonribosomal Peptide Synthetase Gene (*mgoA*) of *Pseudomonas syringae* Pv. *syringae* Is Involved in Mangotoxin Biosynthesis and Is Required for Full Virulence. *Mol. Plant-Microbe Interact.* **2007**, *20* (5), 500–509.
- (16) Carrión, V. J.; Arrebola, E.; Cazorla, F. M.; Murillo, J.; de Vicente, A. The *mbo* Operon Is Specific and Essential for Biosynthesis of Mangotoxin in *Pseudomonas syringae*. *PLoS ONE* **2012**, *7* (5), e36709.
- (17) Carrión, V. J.; Gutiérrez-Barranquero, J. A.; Arrebola, E.; Bardaji, L.; Codina, J. C.; de Vicente, A.; Cazorla, F. M.; Murillo, J. The Mangotoxin Biosynthetic Operon (*mbo*) Is Specifically Distributed Within *Pseudomonas syringae* Genomespecies 1 and Was Acquired Only Once During Evolution. *Appl. Environ. Microbiol.* **2013**, *79* (3), 756–767.
- (18) Sultanov, R. I.; Arapidi, G. P.; Vinogradova, S. V.; Govorun, V. M.; Luster, D. G.; Ignatov, A. N. Comprehensive Analysis of Draft Genomes of Two Closely Related *Pseudomonas syringae* Phylogroup 2b Strains Infecting Mono- and Dicotyledon Host Plants. *BMC Genomics* **2016**, *17*, 1010.
- (19) Marcelletti, S.; Scortichini, M. Comparative Genomic Analyses of Multiple *Pseudomonas* Strains Infecting *Corylus avellana* Trees Reveal the Occurrence of Two

Genetic Clusters with Both Common and Distinctive Virulence and Fitness Traits. *PLoS ONE* **2015**, *10* (7), e0131112.

(20) Arrebola, E.; Carrión, V. J.; Cazorla, F. M.; Pérez-García, A.; Murillo, J.; de Vicente, A. Characterisation of the *mgo* Operon in *Pseudomonas syringae* Pv. *syringae* UMAF0158 That Is Required for Mangotoxin Production. *BMC Microbiol.* **2012**, *12* (1), 10–17.

(21) Carrión, V. J.; van der Voort, M.; Arrebola, E.; Gutiérrez-Barranquero, J. A.; de Vicente, A.; Raaijmakers, J. M.; Cazorla, F. M. Mangotoxin Production of *Pseudomonas syringae* Pv. *syringae* Is Regulated by MgoA. *BMC Microbiol.* **2014**, *14* (1), 46.

(22) He, J.; Hertweck, C. Biosynthetic Origin of the Rare Nitroaryl Moiety of the Polyketide Antibiotic Aureothin: Involvement of an Unprecedented *N*-Oxygenase. *J. Am. Chem. Soc.* **2004**, *126* (12), 3694–3695.

(23) Vallet-Gely, I.; Opota, O.; Boniface, A.; Novikov, A.; Lemaitre, B. A Secondary Metabolite Acting as a Signalling Molecule Controls *Pseudomonas entomophila* Virulence. *Cell. Microbiol.* **2010**, *12* (11), 1666–1679.

(24) Mehnaz, S.; Bauer, J. S.; Gross, H. Complete Genome Sequence of the Sugar Cane Endophyte *Pseudomonas aurantiaca* PB-St2, a Disease-Suppressive Bacterium with Antifungal Activity Toward the Plant Pathogen *Colletotrichum falcatum*. *Genome Announc.* **2014**, *2* (1), e01108–e01113.

(25) Van Der Voort, M.; Meijer, H. J. G.; Schmidt, Y.; Watrous, J.; Dekkers, E.; Mendes, R.; Dorrestein, P. C.; Gross, H.; Raaijmakers, J. M. Genome Mining and Metabolic Profiling of the Rhizosphere Bacterium *Pseudomonas* Sp. SH-C52 for Antimicrobial Compounds. *Front. Microbiol.* **2015**, *6*, 693.

(26) Loper, J. E.; Hassan, K. A.; Mavrodi, D. V.; Davis II, E. W.; Lim, C. K.; Shaffer, B. T.; Elbourne, L. D. H.; Stockwell, V. O.; Hartney, S. L.; Breakwell, K.; Henkels, M. D.; Tetu, S. G.; Rangel, L. I.; Kidarsa, T. A.; Wilson, N. L.; van de Mortel, J. E.; Song, C.; Blumhagen, R.; Radune, D.; Hostetler, J. B.; Brinkac, L. M.; Durkin, A. S.; Kluepfel, D. A.; Wechter, W. P.; Anderson, A. J.; Kim, Y. C.; Pierson III, L. S.; Pierson, E. A.; Lindow, S. E.; Kobayashi, D. Y.; Raaijmakers, J. M.; Weller, D. M.; Thomashow, L. S.; Allen, A. E.; Paulsen, I. T. Comparative Genomics of Plant-Associated *Pseudomonas*

Spp.: Insights Into Diversity and Inheritance of Traits Involved in Multitrophic Interactions. *PLoS Genet.* **2012**, 8 (7), e1002784.

(27) Jenul, C.; Sieber, S.; Daepfen, C.; Mathew, A.; Lardi, M.; Pessi, G.; Hoepfner, D.; Neuburger, M.; Linden, A.; Gademann, K.; Eberl, L. Biosynthesis of Fragin Is Controlled by a Novel Quorum Sensing Signal. *Nat. Commun.* 2018, 9 (1), 1297.

(28) Jenul, C.; Sieber, S.; Gademann, K.; Eberl, L. Ein Neues Signalmolekül in *Burkholderia cenocepacia*. *BIOspektrum* **2019**, 25 (4), 368–371.

(29) Hermenau, R.; Ishida, K.; Gama, S.; Hoffmann, B.; Pfeifer-Leeg, M.; Plass, W.; Mohr, J. F.; Wichard, T.; Saluz, H.-P.; Hertweck, C. Gramibactin Is a Bacterial Siderophore with a Diazeniumdiolate Ligand System. *Nat. Chem. Biol.* **2018**, 14, 841–843.

(30) Hermenau, R.; Mehl, J. L.; Ishida, K.; Dose, B.; Pidot, S. J.; Stinear, T. P.; Hertweck, C. Genomics-Driven Discovery of NO-Donating Diazeniumdiolate Siderophores in Diverse Plant-Associated Bacteria. *Angew. Chem., Int. Ed. Engl.* **2019**, 58 (37), 13024–13029.

(31) Jiao, J.; Du, J.; Frediansyah, A.; Jahanshah, G.; Gross, H. Structure Elucidation and Biosynthetic Locus of Trinickiabactin From the Plant Pathogenic Bacterium *Trinickia caryophylli*. *J. Antibiot.* **2020**, 73 (1), 28–34.

(32) Wang, M.; Niikura, H.; He, H.-Y.; Daniel-Ivad, P.; Ryan, K. S. Biosynthesis of the N-N-Bond-Containing Compound L-Alanosine. *Angew. Chem., Int. Ed. Engl.* **2020**, 59 (10), 3881–3885.

(33) Ng, T. L.; McCallum, M. E.; Zheng, C. R.; Wang, J. X.; Wu, K. J. Y.; Balskus, E. P. The L-Alanosine Gene Cluster Encodes a Pathway for Diazeniumdiolate Biosynthesis. *ChemBioChem* **2020**, 21 (8), 1155–1160.

(34) Sieber, S.; Daepfen, C.; Jenul, C.; Mannancheril, V.; Eberl, L.; Gademann, K. Biosynthesis and Structure Activity Relationship Investigations of the Diazeniumdiolate Antifungal Agent Fragin. *ChemBioChem* **2020**, 21, 1587–1592.

(35) Kretsch, A. M.; Morgan, G. L.; Tyrrell, J.; Mevers, E.; Vallet-Gely, I.; Li, B. Discovery of (Dihydro)pyrazine N-Oxides via Genome Mining in *Pseudomonas*. *Org. Lett.* **2018**, 20 (16), 4791–4795.



- (36) Morgan, G. L. ; Li, B. In Vitro Reconstitution Reveals a Central Role for the *N*-Oxygenase PvfB in (Dihydro)pyrazine-*N*-oxide and Valdiazen Biosynthesis. *Angew. Chem. Int. Ed.* **2020**, 10.1002/anie.202005554.
- (37) Morgan, G. L.; Kretsch, A. M.; Santa Maria, K. C.; Weeks, S. J.; Li, B. Specificity of Nonribosomal Peptide Synthetases in the Biosynthesis of the *Pseudomonas virulence Factor*. *Biochemistry* **2019**, 58 (52), 5249–5254.
- (38) Breuning, M.; Häuser, T.; Tanzer, E.-M. A Novel One-Pot Procedure for the Stereoselective Synthesis of Alpha-Hydroxy Esters From Ortho Esters. *Org. Lett.* **2009**, 11 (18), 4032–4035.
- (39) Dolak, L. A.; Castle, T. M.; Hannon, B. R.; Argoudelis, A. D.; Reusser, F. Fermentation, Isolation, Characterization and Structure of Nitrosofungin. *J. Antibiot.* **1983**, 36 (11), 1425–1430.
- (40) Hrabie, J. A.; Keefer, L. K. Chemistry of the Nitric Oxide-Releasing Diazeniumdiolate (“Nitrosohydroxylamine”) Functional Group and Its Oxygen-Substituted Derivatives. *Chem. Rev.* **2002**, 102 (4), 1135–1154.
- (41) Cazorla, F. M.; Torés, J. A.; Olalla, L.; Pérez-García, A.; Farré, J. M.; de Vicente, A. Bacterial Apical Necrosis of Mango in Southern Spain: a Disease Caused by *Pseudomonas syringae* Pv. *syringae*. *Phytopathology* **1998**, 88 (7), 614–620.
- (42) Gutiérrez-Barranquero, J. A.; Carrión, V. J.; Murillo, J.; Arrebola, E.; Arnold, D. L.; Cazorla, F. M.; de Vicente, A. A *Pseudomonas syringae* Diversity Survey Reveals a Differentiated Phylotype of the Pathovar *syringae* Associated with the Mango Host and Mangotoxin Production. *Phytopathology* **2013**, 103 (11), 1115–1129.
- (43) Kai, K.; Ohnishi, H.; Shimatani, M.; Ishikawa, S.; Mori, Y.; Kiba, A.; Ohnishi, K.; Tabuchi, M.; Hikichi, Y. Methyl 3-Hydroxymyristate, a Diffusible Signal Mediating *phc* Quorum Sensing in *Ralstonia solanacearum*. *ChemBioChem* **2015**, 16 (16), 2309–2318.
- (44) Wang, D.; Ding, X.; Rather, P. N. Indole Can Act as an Extracellular Signal in *Escherichia coli*. *J. Bacteriol.* **2001**, 183 (14), 4210–4216.
- (45) Flavier, A. B.; Clough, S. J.; Schell, M. A.; Denny, T. P. Identification of 3-Hydroxypalmitic Acid Methyl Ester as a Novel Autoregulator Controlling Virulence in *Ralstonia solanacearum*. *Mol. Microbiol.* **1997**, 26 (2), 251–259.

(46) Dickey, S. W.; Cheung, G. Y. C.; Otto, M. Different Drugs for Bad Bugs: Antivirulence Strategies in the Age of Antibiotic Resistance. *Nat. Rev. Drug Discovery* **2017**, *16* (7), 457–471.

(47) LaSarre, B.; Federle, M. J. Exploiting Quorum Sensing to Confuse Bacterial Pathogens. *Microbiol. Mol. Biol. Rev.* **2013**, *77* (1), 73–111.

(48) Dong, Y.-H.; Wang, L.-H.; Xu, J.-L.; Zhang, H.-B.; Zhang, X.-F.; Zhang, L.-H. Quenching Quorum-Sensing-Dependent Bacterial Infection by an *N*-Acyl Homoserine Lactonase. *Nature* **2001**, *411*, 813–817.

(49) Zhu, C.; Yu, Z.; Sun, M. Restraining *Erwinia* Virulence by Expression of *N*-Acyl Homoserine Lactonase Gene *pro3A-aiiA* in *Bacillus thuringiensis* Subsp *Leesis*. *Biotechnol. Bioeng.* **2006**, *95* (3), 526–532.

(50) Zhao, C.; Zeng, H.; Yu, Z.; Sun, M. *N*-Acyl Homoserine Lactonase Promotes Prevention of *Erwinia* Virulence with Zwittermicin a-Producing Strain *Bacillus cereus*. *Biotechnol. Bioeng.* **2008**, *100* (3), 599–603.

(51) Bamberger, E. Zur Kenntniss Der Nitrosoalphyhydroxylamine. *Ber. Dtsch. Chem. Ges.* **1898**, *31* (1), 574–589.

(52) Delgado-Enciso, I.; Madrigal-Perez, V. M.; Lara-Esqueda, A.; Diaz-Sanchez, M. G.; Guzman-Esquivel, J.; Rosas-Vizcaino, L. E.; Virgen-Jimenez, O. O.; Kleiman-Trujillo, J.; Lagarda-Canales, M. R.; Ceja-Espiritu, G.; Rangel-Salgado, V.; Lopez-Lemus, U. A.; Delgado-Enciso, J.; Lara-Basulto, A. D.; Soriano Hernández, A. D. Topical 5% Potassium Permanganate Solution Accelerates the Healing Process in Chronic Diabetic Foot Ulcers. *Biomed. Rep.* **2018**, *8* (2), 156–159.

(53) Reuveni, M.; Agapov, V.; Reuveni, R. A Foliar Spray of Micronutrient Solutions Induces Local and Systemic Protection Against Powdery Mildew (*Sphaerotheca fuliginia*) in Cucumber Plants. *Eur. J. Plant. Pathol.* **1997**, *103* (7), 581–588.

(54) Commission Regulation EC No 889/2008 Laying Down Detailed Rules for the Implementation of Council Regulation (EC) No 834/2007 on Organic Production and Labelling of Organic Products with Regard to Organic Production, Labelling and Control. *OJ* **2008**, L250.

(55) Cazorla, F. M.; Arrebola, E.; Olea, F.; Velasco, L.; Hermoso, J. M.; Pérez-García, A.; Torés, J. A.; Farré, J. M.; de Vicente, A. Field Evaluation of Treatments for the

Control of the Bacterial Apical Necrosis of Mango (*Mangifera indica*) Caused by *Pseudomonas syringae* P.v. *syringae*. *Eur. J. Plant Pathol.* **2006**, 166, 279–288.

(56) Kremmydas, G. F.; Tampakaki, A. P.; Georgakopoulos, D. G. Characterization of the Biocontrol Activity of *Pseudomonas fluorescens* Strain X Reveals Novel Genes Regulated by Glucose. *PLoS ONE* **2013**, 8 (4), e61808
